# Supplementary material
Source: publisher figshare collection journal article supplement (https://gsajournals.figshare.com/ndownloader/files/18059180)
Supplement: Supplementary file 1 [file 18059180]

|  |  |
| --- | --- |

**Figure S2. Fragment size distributions of sequencing libraries**

Fragment sizes are defined as the outer end-to-end mapping distance on the final genome assembly. A typical fosmid pool PE library (one of 96), with a peak fragment size of 316 bp, is shown in green. The WGS PE libraries have peak fragment sizes of 471, 589, and 692 bp. On the right are shown the two MP libraries (3.8 and 6.8 kb) and the FE library with a peak of 34.5 kb.
